# Supplementary material for: Sulphite oxidase (SO) – a mitochondrial autoantigen as target for humoral and cellular immune reactions in primary sclerosing cholangitis
Source: Springer Nature journal article supplement (doi:10.1186/s12876-018-0787-x), 2018-05-02
Supplement: MOESM1 [file 15733086]

## Additional file 1

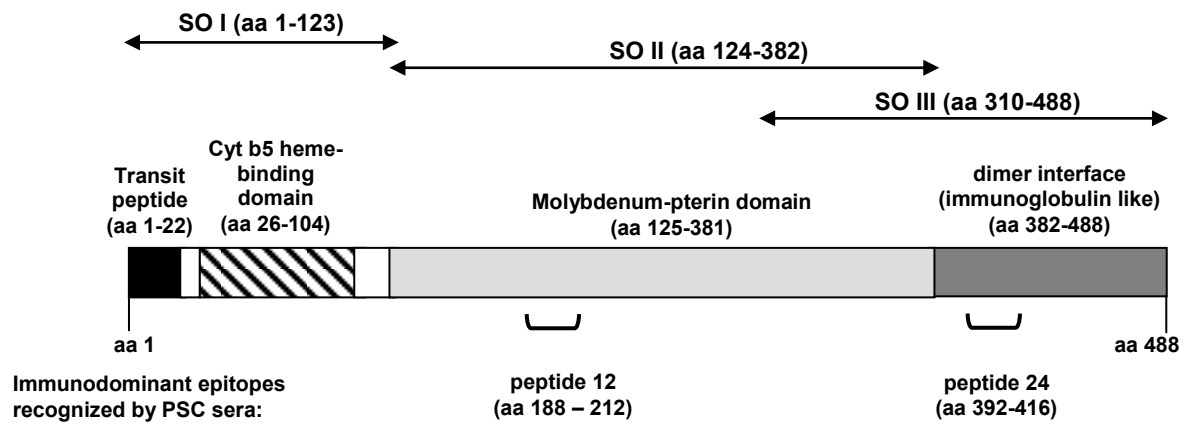

Schematic presentation of the enzyme sulfite oxidase (SO) with its different domains, and the immunodominant epitopes recognized by PSC sera (aa = amino acid; mo = molybdenum binding site)
