# Supplementary material for: Sulphite oxidase (SO) – a mitochondrial autoantigen as target for humoral and cellular immune reactions in primary sclerosing cholangitis
Source: Springer Nature journal article supplement (doi:10.1186/s12876-018-0787-x), 2018-05-02
Supplement: MOESM3 [file 15733086]

### Additional file 3 Overlapping synthetic peptides of human SO protein chain

|       | Peptide | Position (aa) | Sequence                                     |
|-------|---------|---------------|----------------------------------------------|
| SO I  | 1       | 1-25          | MGTLLGLGAVLAYQDHR <b>CRAAQEST</b>            |
|       | 2       | 18-43         | <b>CRAAQEST</b> HIYTKEEVSSHTSPETG            |
|       | 3       | 35-59         | <b>SHTSPETG</b> IWVTLGSEVFDVTEFVD            |
|       | 4       | 52-76         | <b>FDVTEFVD</b> LH*PGGPSKL <b>MLAAGGPL</b>   |
|       | 5       | 69-93         | <b>MLAAGGPL</b> EPFWALYAVH*NQSHVRE           |
|       | 6       | 86-110        | <b>H*NQSHVRE</b> LLAQYKIGELNPEDKVA           |
| SO II | 7       | 103-127       | <b>LNPEDKV</b> APTNETSDPY <b>ADDPVRHP</b>    |
|       | 8       | 120-144       | <b>ADDPVRHP</b> ALKVNSQRPFNAEPPPE            |
|       | 9       | 137-161       | <b>FNAEPPPE</b> LLTENYITPNPIFFTRN            |
|       | 10      | 154-178       | <b>NPIFFTRN</b> HLPVNLDPD <b>TYRLHV</b>      |
|       | 11      | 171-195       | <b>DTYRLHV</b> VGAPGGQSL <b>SLDDLHN</b>      |
|       | 12      | 188-212       | <b>LSLDDLHN</b> FPRYEITVTL <b>QC**AGNRR</b>  |
|       | 13      | 205-229       | <b>LQC**AGNRR</b> SEMTQVKEV <b>KGLEWRTG</b>  |
|       | 14      | 222-246       | <b>KGLEWRTG</b> AISTARWAGAR <b>LCDVLA</b>    |
|       | 15      | 239-263       | <b>ARLCDVLA</b> QAGHQ <b>LCETE</b> AHVC**FEG |
|       | 16      | 256-280       | <b>EAHVC**FEG</b> LSDPTGTAY <b>GASIPLA</b>   |
|       | 17      | 273-297       | <b>YGASIPLA</b> RAMDPEAEVLLAYEMNG            |
|       | SO III  | 18            | 290-314                                      |
| 19    |         | 307-331       | <b>PVRVVPG</b> VVGARHV <b>KWLGRVSVQP</b>     |
| 20    |         | 324-348       | <b>LGRVSVQP</b> EESYSHWQRRDY <b>KGFSP</b>    |
| 21    |         | 341-365       | <b>RDYKGFSP</b> SDWETVDF <b>DSAPSIQE</b>     |
| 22    |         | 358-382       | <b>DSAPSIQE</b> LPVQSAITEPRD <b>GETVE</b>    |
| 23    |         | 375-399       | <b>PRDGETVE</b> SGEVTIKGYAW <b>SGGGRA</b>    |
| 24    |         | 392-416       | <b>AWSGGGRA</b> VIRVDVSLD <b>GGLTWQVA</b>    |
| 25    |         | 409-433       | <b>GGLTWQVA</b> KLDGEEQRPR <b>KAWAWRL</b>    |
| 26    |         | 426-450       | <b>RKAWAWRL</b> WQLKAPVPAG <b>QKELNIV</b>    |
| 27    |         | 443-467       | <b>GQKELNIV</b> CKAVDDGYN <b>VQPD</b> TVAP   |
| 28    |         | 460-484       | <b>VQPD</b> TVAPIWNL <b>RGVLSNAWHRVHV</b>    |
| 29    |         | 464-488       | <b>TVAPIWNL</b> RGVLSNAWHRVHVYVSP            |

The overlapping amino acids are marked by bold letters.

\*: binding sites for iron as heme axial ligand in position aa 61 and aa 86.

\*\* : binding sites for molybdenum pterin in position aa 207 and aa 260.
