# Supplementary material for: Sulphite oxidase (SO) – a mitochondrial autoantigen as target for humoral and cellular immune reactions in primary sclerosing cholangitis
Source: Springer Nature journal article supplement (doi:10.1186/s12876-018-0787-x), 2018-05-02
Supplement: MOESM4 [file 15733086]

## Additional file 4

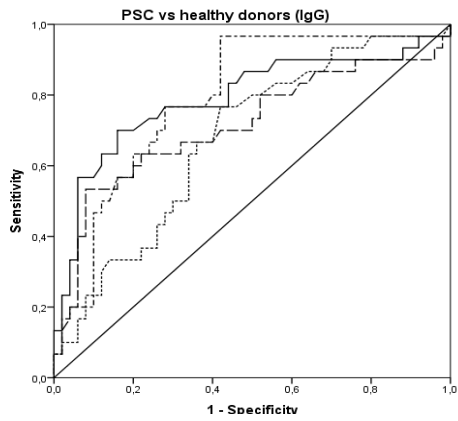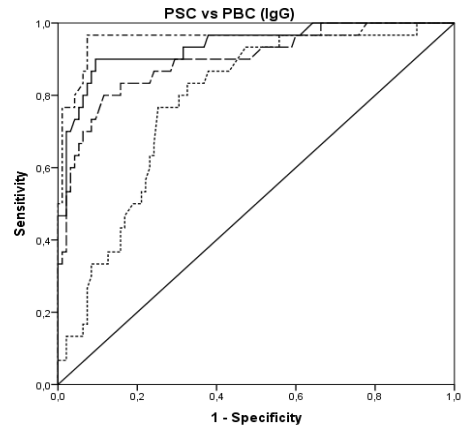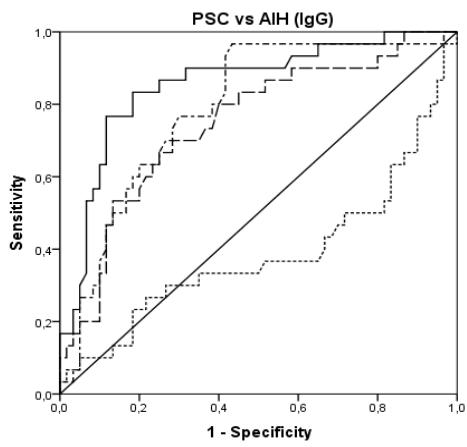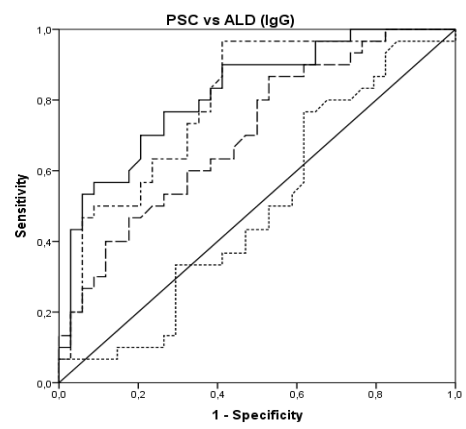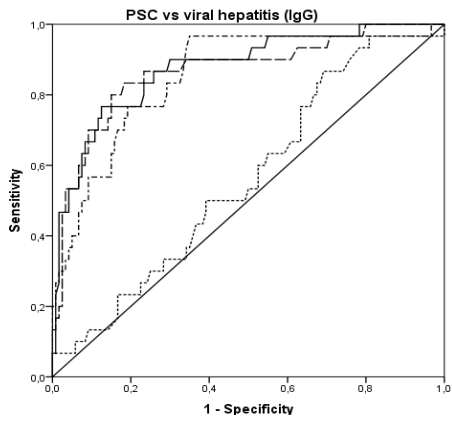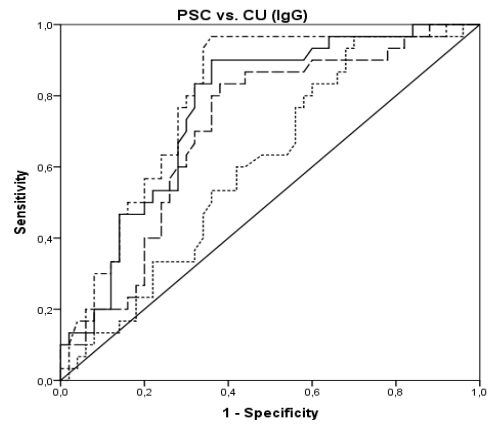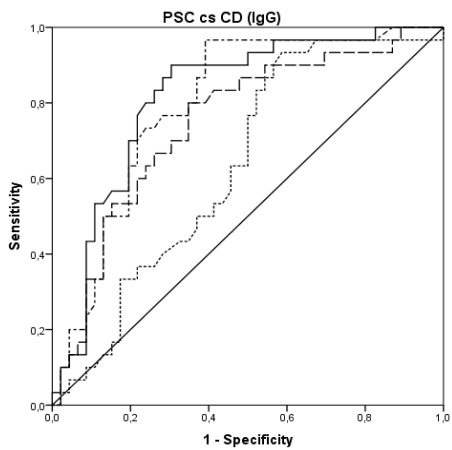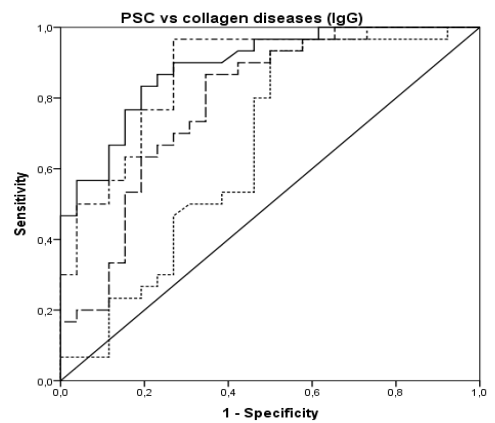

Receiver operating curve (ROC) analysis for IgG-antibodies to the four SO-proteins comparing sera from PSC patients with those from healthy donors, PBC, AIH, alcoholic liver disease (ALD), viral hepatitis, ulcerative colitis (CU), Crohn disease (CD), and collagen disorders (B) — SO-fl; — · SO-I - - SO-II ..... SO-III

Significances for anti-SO antibodies of the **IgG-type** comparing PSC-patients and patients with other disorders by ROC curves calculating area under the curves (AUC)

| PSC vs.                 | SO-fl |              | SO-I |              | SO-II |              | SO-III |              |
|-------------------------|-------|--------------|------|--------------|-------|--------------|--------|--------------|
|                         | AUC   | p            | AUC  | p            | AUC   | p            | AUC    | p            |
| Healthy donors          | 0,79  | <b>0,000</b> | 0,79 | <b>0,000</b> | 0,71  | <b>0,001</b> | 0,68   | <b>0,009</b> |
| PBC                     | 0,94  | <b>0,000</b> | 0,96 | <b>0,000</b> | 0,90  | <b>0,000</b> | 0,78   | <b>0,000</b> |
| AIH                     | 0,86  | <b>0,000</b> | 0,79 | <b>0,000</b> | 0,75  | <b>0,000</b> | 0,39   | 0,077        |
| ALD                     | 0,82  | <b>0,000</b> | 0,80 | <b>0,000</b> | 0,70  | <b>0,005</b> | 0,49   | 0,936        |
| Viral hepatitis         | 0,88  | <b>0,000</b> | 0,85 | <b>0,000</b> | 0,87  | <b>0,000</b> | 0,56   | 0,302        |
| Ulcerative colitis (CU) | 0,76  | <b>0,000</b> | 0,80 | <b>0,000</b> | 0,71  | <b>0,002</b> | 0,61   | 0,111        |
| Crohn disease (CD)      | 0,816 | <b>0,000</b> | 0,80 | <b>0,000</b> | 0,75  | <b>0,000</b> | 0,63   | <b>0,049</b> |
| Collagen disorders      | 0,89  | <b>0,000</b> | 0,87 | <b>0,000</b> | 0,79  | <b>0,000</b> | 0,66   | <b>0,041</b> |
| PSC treated             | 0,70  | <b>0,012</b> | 0,69 | <b>0,021</b> | 0,62  | 0,141        | 0,61   | 0,181        |

Significances for anti-SO antibodies of the **IgM-type** comparing PSC-patients and patients with other disorders by ROC curves (not shown as a figure) calculating area under the curves (AUC)

| PSC vs.            | SO fl |              | SO I |              | SO II |              | SO III |              |
|--------------------|-------|--------------|------|--------------|-------|--------------|--------|--------------|
|                    | AUC   | p            | AUC  | p            | AUC   | p            | AUC    | p            |
| Healthy donors     | 0,64  | <b>0,045</b> | 0,55 | 0,484        | 0,67  | <b>0,011</b> | 0,75   | <b>0,000</b> |
| PBC                | 0,95  | <b>0,000</b> | 0,87 | <b>0,000</b> | 0,97  | <b>0,000</b> | 0,97   | <b>0,000</b> |
| AIH                | 0,82  | <b>0,000</b> | 0,76 | <b>0,000</b> | 0,83  | <b>0,000</b> | 0,90   | <b>0,000</b> |
| ALD                | 0,79  | <b>0,000</b> | 0,71 | <b>0,004</b> | 0,80  | <b>0,000</b> | 0,85   | <b>0,000</b> |
| Viral hepatitis    | 0,81  | <b>0,000</b> | 0,71 | <b>0,000</b> | 0,80  | <b>0,000</b> | 0,83   | <b>0,000</b> |
| Ulcerative colitis | 0,75  | <b>0,000</b> | 0,66 | <b>0,015</b> | 0,80  | <b>0,000</b> | 0,813  | <b>0,000</b> |
| Crohn disease      | 0,72  | <b>0,001</b> | 0,65 | <b>0,034</b> | 0,68  | <b>0,009</b> | 0,801  | <b>0,000</b> |
| Collagen disorders | 0,95  | <b>0,000</b> | 0,85 | <b>0,000</b> | 0,93  | <b>0,000</b> | 0,95   | <b>0,041</b> |
| PSC treated        | 0,75  | <b>0,002</b> | 0,72 | <b>0,007</b> | 0,75  | <b>0,002</b> | 0,75   | <b>0,002</b> |

AUC = area under the curve
