# Supplementary material for: Sulphite oxidase (SO) – a mitochondrial autoantigen as target for humoral and cellular immune reactions in primary sclerosing cholangitis
Source: Springer Nature journal article supplement (doi:10.1186/s12876-018-0787-x), 2018-05-02
Supplement: MOESM5 [file 15733086]

## Additional file 5

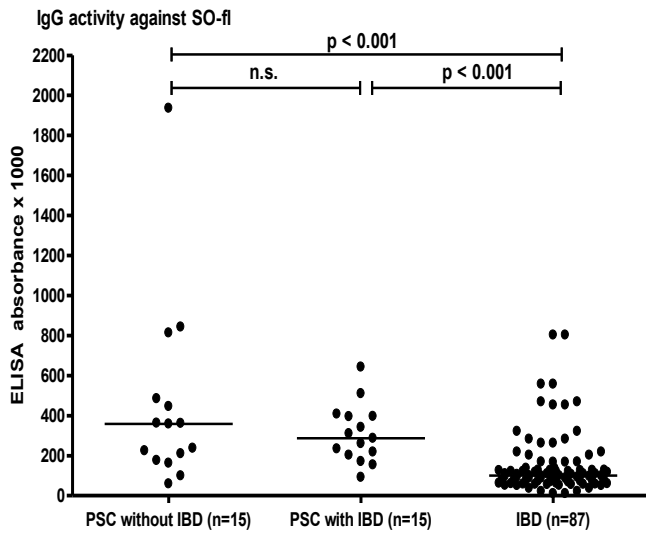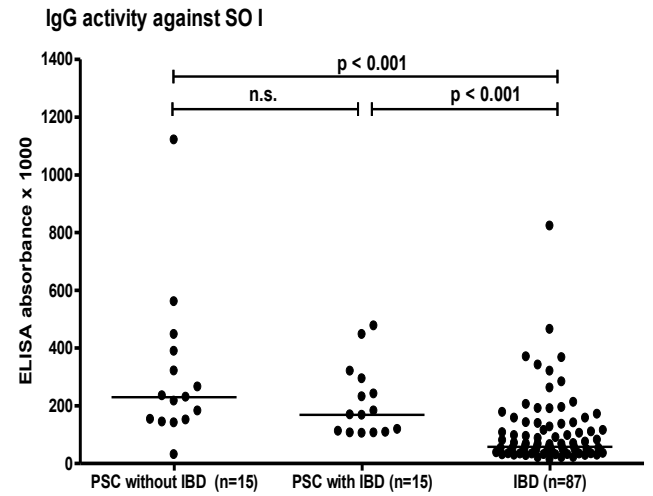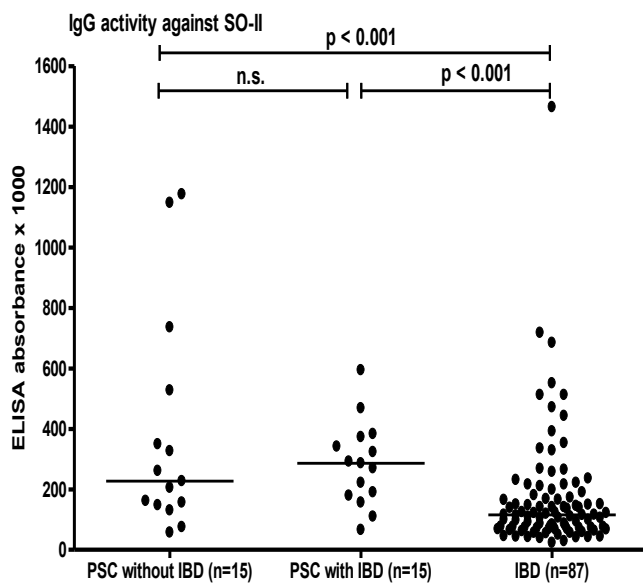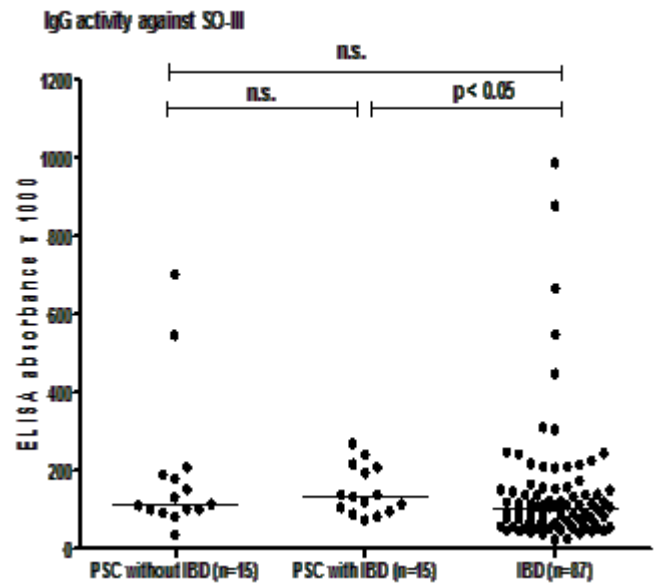

Activity of IgG-antibodies against the four SO-proteins in sera from untreated PSC-patients without and with IBD as well as in patients with pure IBD as determined by ELISA. Individual values (●) and median (—) are given.  $p < 0.05$  (with post-hoc tests Tukey and Bonferroni).
